# Supplementary material for: Classification of Clear Cell Renal Cell Carcinoma based on Tumor Suppressor Genomic Profiling
Source: PubMed Central journal article supplement (PMC7974878; doi:10.7150/jca.50462), 2021-02-22
Supplement: jcav12p2359s1.pdf [file jcav12p2359s1.pdf]

## Supplementary materials

### Supplementary Figure

#### Figure S1

Validation of tumor suppressor gene-related subtypes of ccRCC in ICGC dataset. (A) The cumulative distribution function (CDF) curves, which can describe the probability distribution of a real random variable, and established using consensus clustering approach. CDF curves of consensus scores was calculated according to the different subtype number ( $k = 2, 3, 4, 5, 6, 7, 8, 9$ ). (B) The CDF Delta area curve of ccRCC samples when  $k=3$ . (C) The heatmap of consensus matrix for three subtypes obtained by estimating of CDF curves. (D) Principal component analysis (PCA) of gene expression profile of the top 100 variance genes. Each sample is represented with a single point, with different color for each of the three subtypes.

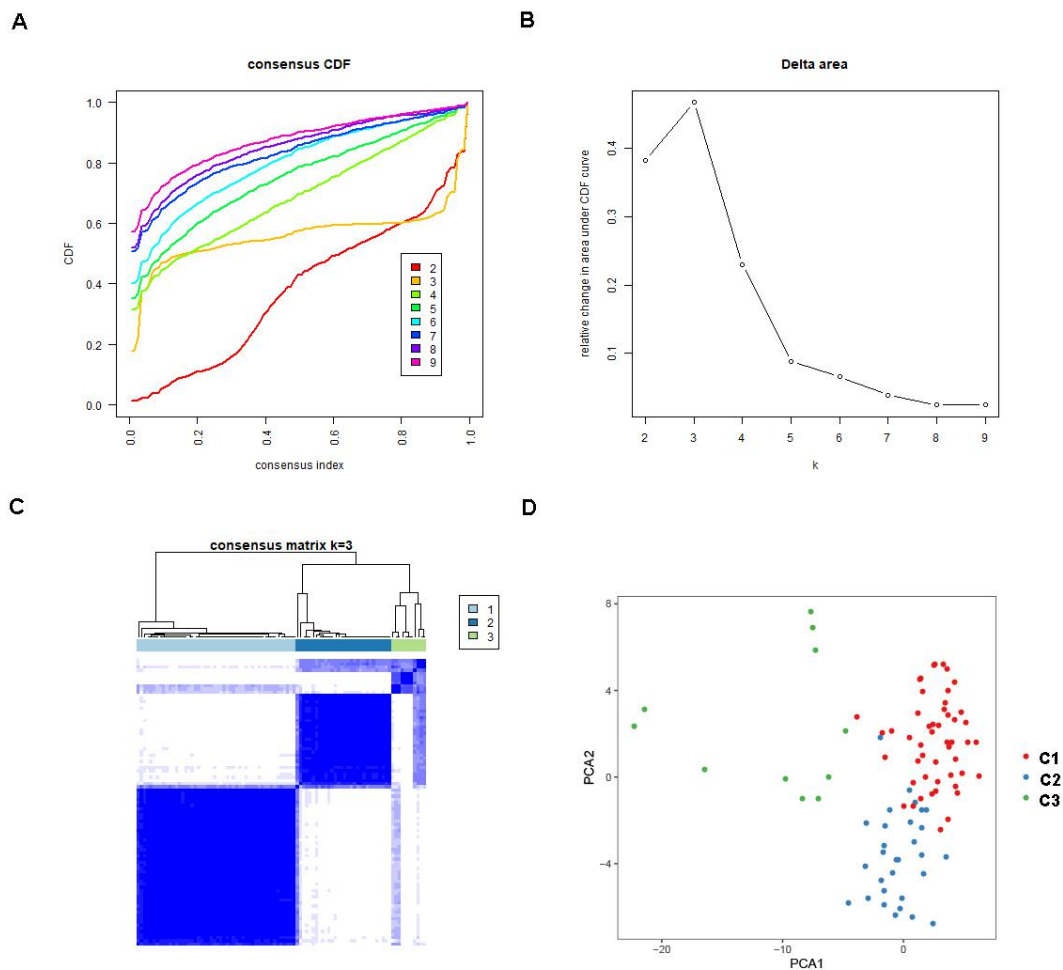

## Figure S2

Heatmap and clinical features of the three subtypes in ICGC validation dataset.

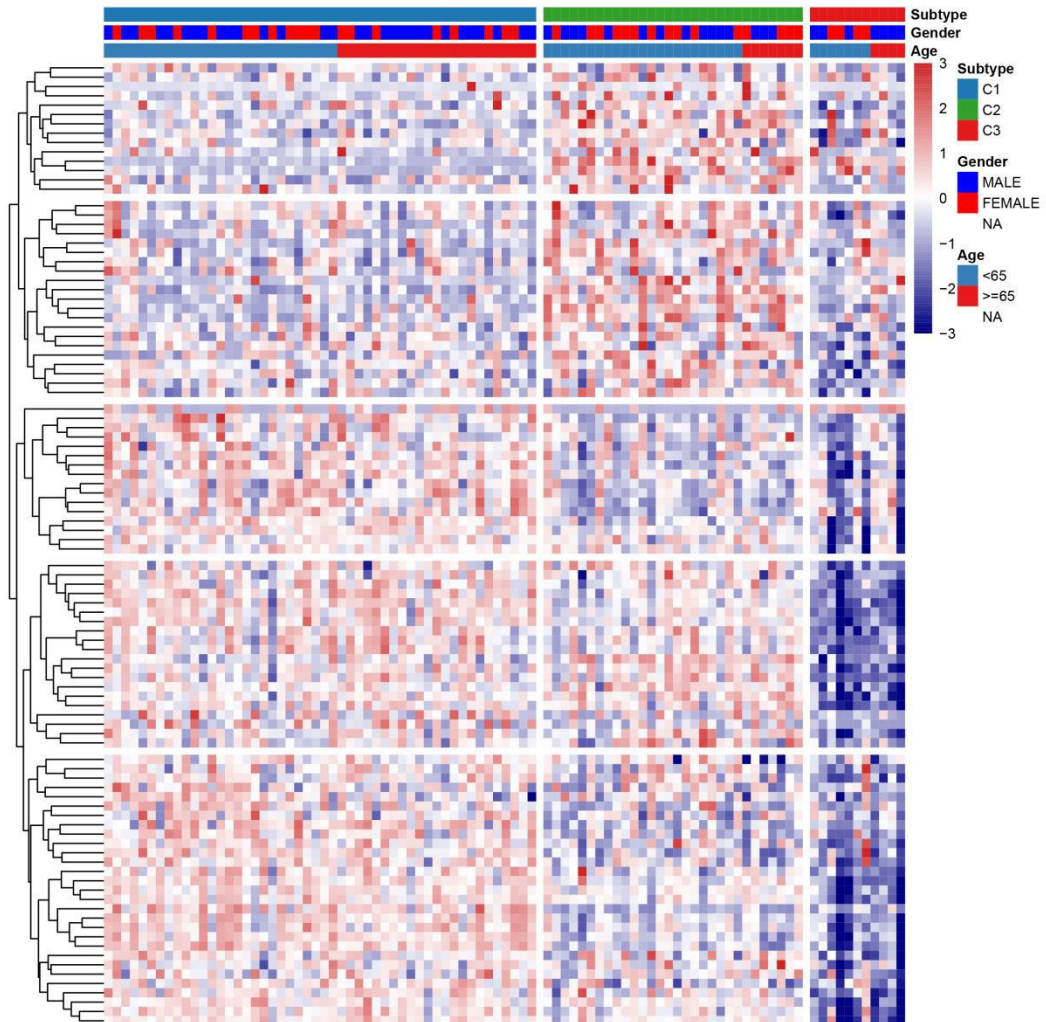

## Figure S3

The SNP alteration of the three molecular subtypes

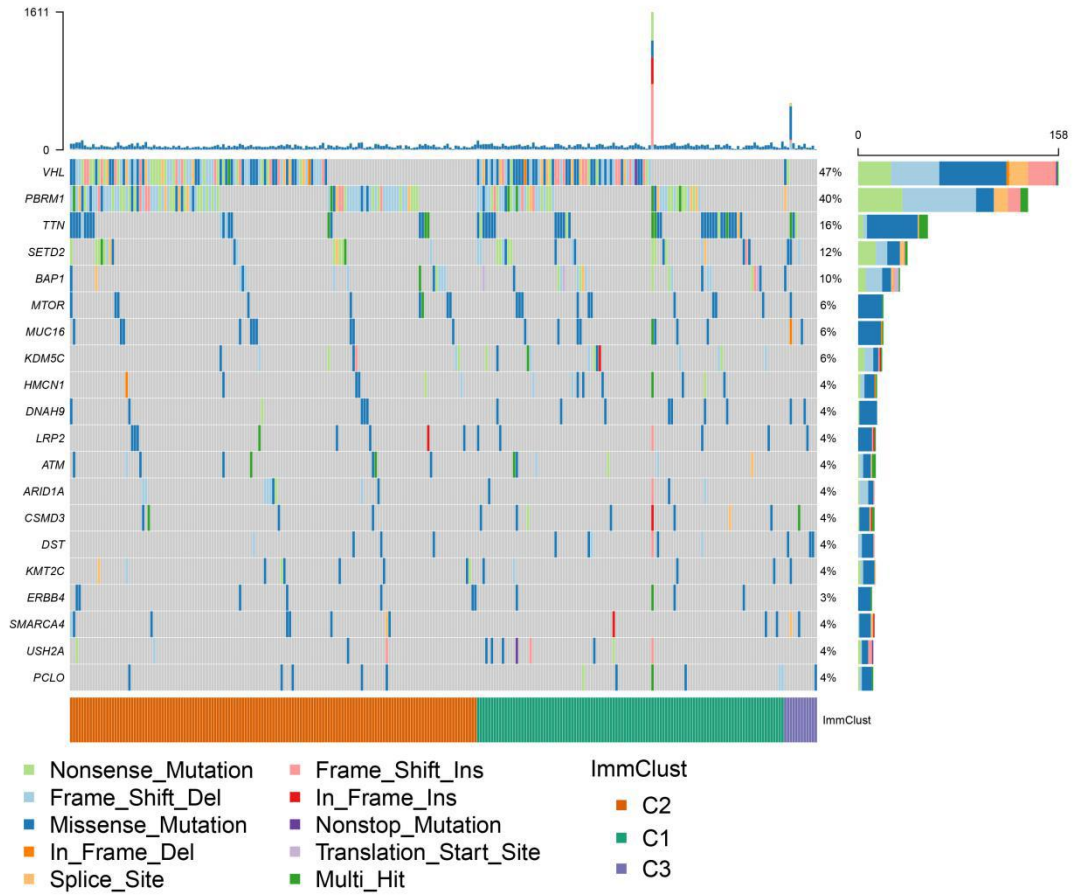

**Figure S4**

Gene Set Variation Analysis (GSVA) between the subtype C2 and subtype C1-C3 using the c2.cp.v7.1.symbols.gmt file as reference dataset

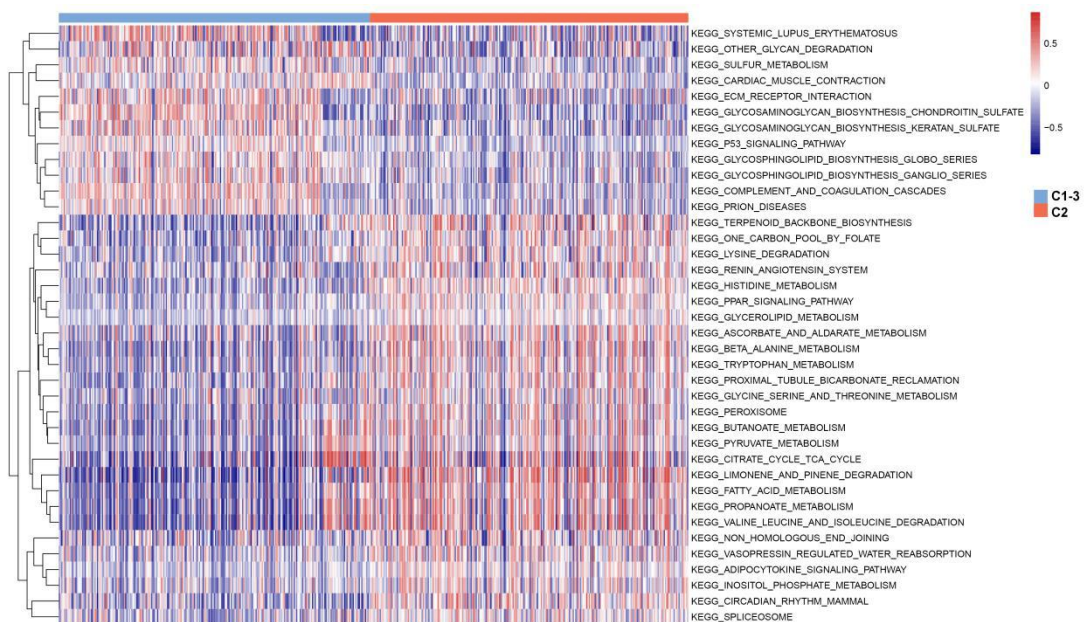





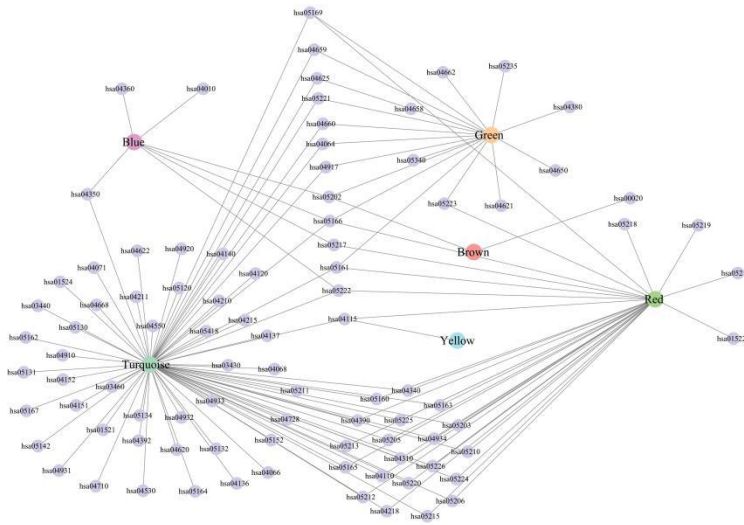

**Figure S7**

The overall expression level of the immune check point among the three subtypes

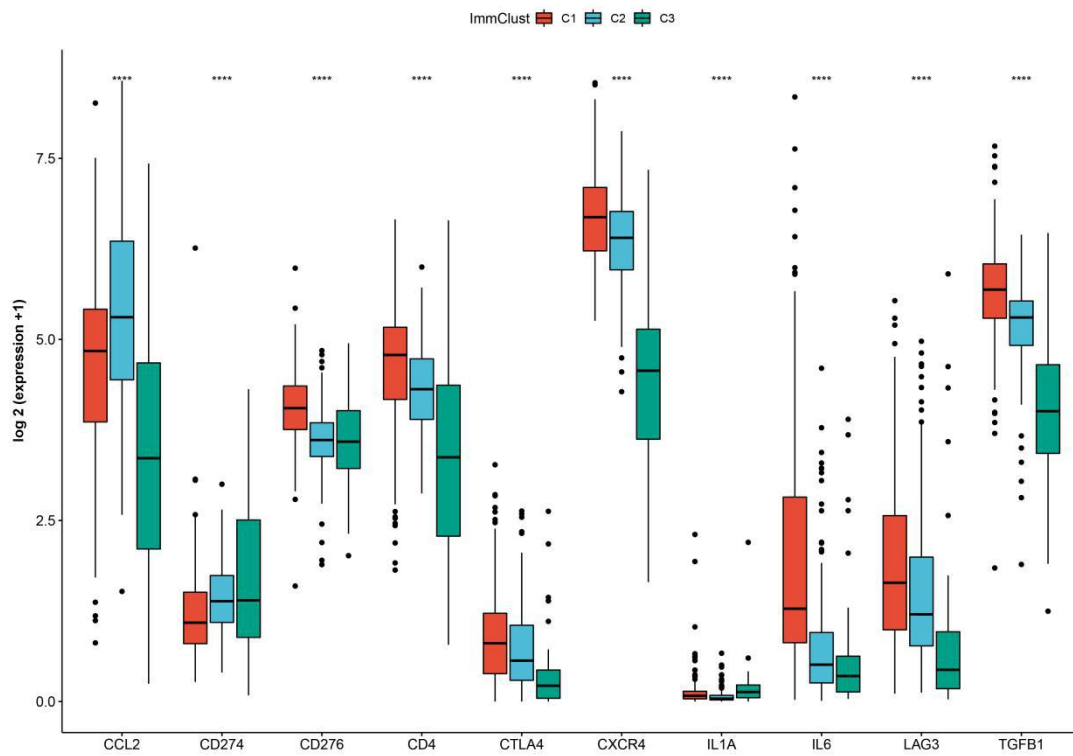

**Figure S8**

Heatmap for the up-regulated genes (A) and down-regulated genes (B) between

subtype C2 and subtype C1-C3

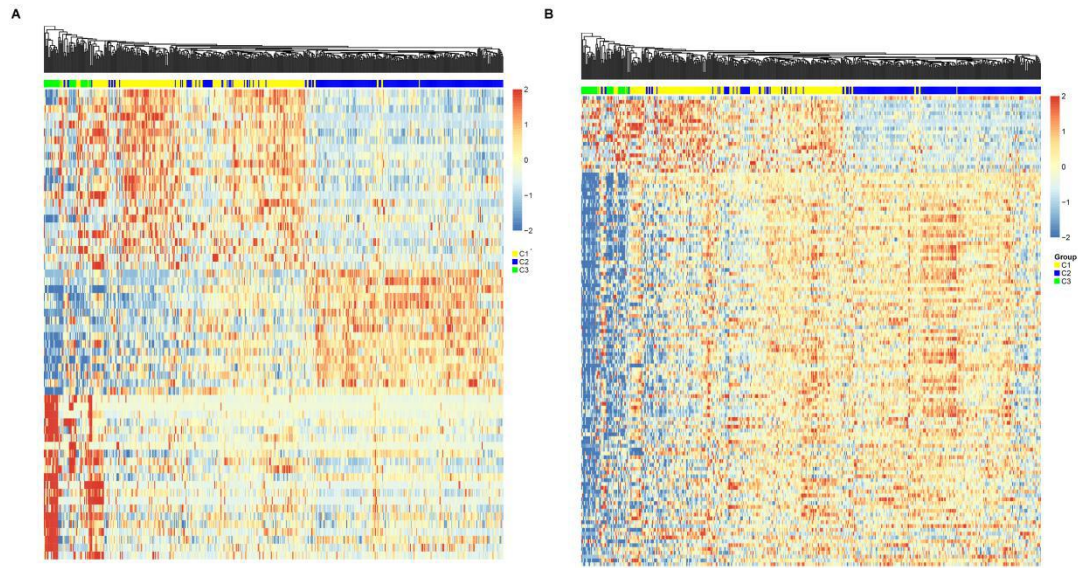

### Supplementary Table

**Table S1**

compounds information that identified by using CMAP database based on differentially expressed TSGs.

| cmap name     | mean   | enrichment | p       | specificity |
|---------------|--------|------------|---------|-------------|
| salsolinol    | -0.518 | -0.873     | 0.00409 | 0           |
| pindolol      | -0.411 | -0.845     | 0.00026 | 0           |
| penbutolol    | -0.343 | -0.832     | 0.00953 | 0.0074      |
| mimosine      | -0.306 | -0.831     | 0.00973 | 0           |
| PHA-00846566E | -0.351 | -0.829     | 0.01    | 0           |
| felbinac      | -0.282 | -0.814     | 0.00215 | 0.0426      |
| nystatin      | -0.428 | -0.804     | 0.01526 | 0.0216      |
| melatonin     | -0.244 | -0.757     | 0.00712 | 0.0256      |
| aconitine     | -0.295 | -0.757     | 0.00716 | 0.0126      |
| cloxacillin   | -0.266 | -0.747     | 0.00818 | 0.0242      |
| metampicillin | -0.299 | -0.737     | 0.00256 | 0.0073      |
| mefexamide    | -0.412 | -0.729     | 0.01104 | 0.0067      |

---

|                    |        |        |         |        |
|--------------------|--------|--------|---------|--------|
| propranolol        | -0.2   | -0.69  | 0.01995 | 0.0222 |
| harpagoside        | -0.247 | -0.676 | 0.02449 | 0.0637 |
| piperacetazine     | -0.278 | -0.669 | 0.02686 | 0.0292 |
| nadide             | -0.297 | -0.656 | 0.03223 | 0.0523 |
| raubasine          | -0.419 | -0.648 | 0.0366  | 0      |
| tocainide          | -0.24  | -0.645 | 0.03776 | 0.1355 |
| nizatidine         | -0.389 | -0.644 | 0.03831 | 0.0791 |
| podophyllotoxin    | -0.263 | -0.638 | 0.04144 | 0.2843 |
| CP-944629          | -0.398 | -0.637 | 0.04176 | 0.0879 |
| suramin sodium     | -0.4   | -0.63  | 0.04597 | 0.0181 |
| metixene           | -0.167 | -0.628 | 0.04691 | 0.0923 |
| dehydrocholic acid | -0.313 | -0.598 | 0.03016 | 0.0217 |
| PNU-0251126        | -0.256 | -0.547 | 0.03371 | 0.1067 |
| etiocholanolone    | -0.137 | -0.543 | 0.03621 | 0.2792 |
| terguride          | 0.394  | 0.525  | 0.01388 | 0      |
| urapidil           | 0.272  | 0.625  | 0.04963 | 0.0211 |
| ribavirin          | 0.46   | 0.63   | 0.04645 | 0.1063 |
| retrorsine         | 0.267  | 0.631  | 0.04625 | 0      |
| gabapentin         | 0.541  | 0.632  | 0.04559 | 0.0076 |
| leflunomide        | 0.456  | 0.632  | 0.04573 | 0.0848 |
| sulfinpyrazone     | 0.325  | 0.638  | 0.04193 | 0.0256 |
| (-)-MK-801         | 0.323  | 0.639  | 0.04132 | 0.0236 |
| amrinone           | 0.488  | 0.641  | 0.04064 | 0.0441 |
| pyrazinamide       | 0.309  | 0.667  | 0.02737 | 0.0315 |
| glibenclamide      | 0.278  | 0.67   | 0.02642 | 0.0354 |
| sulfametoxydiazine | 0.284  | 0.676  | 0.02433 | 0.0472 |
| meropenem          | 0.306  | 0.683  | 0.02166 | 0.0081 |
| bisacodyl          | 0.348  | 0.691  | 0.01886 | 0.0851 |

---

---

|                |       |       |         |        |
|----------------|-------|-------|---------|--------|
| ketorolac      | 0.499 | 0.703 | 0.01611 | 0      |
| ricinine       | 0.346 | 0.705 | 0.01562 | 0.0069 |
| etynodiol      | 0.244 | 0.705 | 0.01574 | 0.0373 |
| pempidine      | 0.32  | 0.708 | 0.00509 | 0.0067 |
| etamsylate     | 0.314 | 0.709 | 0.01472 | 0.0273 |
| flavoxate      | 0.422 | 0.72  | 0.01241 | 0      |
| quinisocaine   | 0.326 | 0.723 | 0.01182 | 0.0214 |
| guanethidine   | 0.515 | 0.738 | 0.03515 | 0.024  |
| sulfaphenazole | 0.36  | 0.762 | 0.00605 | 0      |
| naftopidil     | 0.451 | 0.801 | 0.01626 | 0      |
| pivampicillin  | 0.472 | 0.819 | 0.00187 | 0      |
| abamectin      | 0.356 | 0.823 | 0.00161 | 0      |
| zomepirac      | 0.297 | 0.823 | 0.00165 | 0.0098 |
| harmine        | 0.354 | 0.828 | 0.00133 | 0      |
| biotin         | 0.565 | 0.836 | 0.00889 | 0      |
| blebbistatin   | 0.629 | 0.845 | 0.04815 | 0.122  |
| 5279552        | 0.495 | 0.849 | 0.04585 | 0.0486 |
| puromycin      | 0.625 | 0.876 | 0.00034 | 0.0955 |
| benzbromarone  | 0.624 | 0.888 | 0.00276 | 0      |

---
